# Supplementary material for: Dietary Amino Acids Promote Glucagon-like Hormone Release to Generate Novel Calcium Waves in Adipose Tissues
Source: Research Square preprint supplement (doi:10.21203/rs.3.rs-4493132/v1), 2024-06-12
Supplement: Supplementary file 1 [file 8b04526cbbc90bc79070386e.xlsx]

## Sheet: Sheet1
	List of genotypes in each figure
	Figure	Panels	Genotype
	Figure 1	Fig. 1(A-H)	Fb-Gal4, UAS-GCaMP5G
	Figure 2	Fig. 2(A-E)	Fb-Gal4, UAS-GCaMP5G
		Fig. 2(F-G)	UAS-Luc-RNAi/Akh-Gal4 (Donor)
			UAS-Kir2.1; Akh-Gal4 (Donor)
			UAS-Akh-RNAi/Akh-Gal4 (Donor)
			Fb-Gal4, UAS-GCaMP5G
		Fig. 2(H-I)	Lpp-Gal4, UAS-GCaMP5G-T2A-mRuby3/UAS-Luc-RNAi
			AkhRnull; Lpp-Gal4, UAS-GCaMP5G-T2A-mRuby3
			Lpp-Gal4, UAS-GCaMP5G-T2A-mRuby3/UAS-Gaq-RNAi
		Fig. 2(J-K)	Lpp-Gal4, UAS-GCaMP5G-T2A-mRuby3
			AkhRnull; Lpp-Gal4, UAS-GCaMP5G-T2A-mRuby3
	Figure 3	Fig. 3(B-C)	Lpp-Gal4, UAS-GCaMP5G-T2A-mRuby3/UAS-Luc-RNAi
			Lpp-Gal4, UAS-GCaMP5G-T2A-mRuby3/UAS-Inx2-RNAi
		Fig. 3(D)	Lpp-Gal4, UAS-GCaMP5G-T2A-mRuby3/UAS-Luc-RNAi
			Lpp-Gal4, UAS-GCaMP5G-T2A-mRuby3/UAS-Inx2-RNAi
			AkhRnull; Lpp-Gal4, UAS-GCaMP5G-T2A-mRuby3
			UAS-Akh; Lpp-Gal4, UAS-GCaMP5G-T2A-mRuby3
		Fig. 3(H-I)	Lpp-Gal4, UAS-GCaMP5G-T2A-mRuby3/UAS-Luc-RNAi
			Lpp-Gal4, UAS-GCaMP5G-T2A-mRuby3/UAS-Inx2-RNAi
		Fig. 3(J-K)	Lpp-Gal4, UAS-GCaMP5G-T2A-mRuby3/UAS-Luc-RNAi
			Lpp-Gal4, UAS-GCaMP5G-T2A-mRuby3/UAS-Inx2-RNAi
			AkhRnull; Lpp-Gal4, UAS-GCaMP5G-T2A-mRuby3
		Fig. 3(L-M)	Lpp-Gal4, UAS-GCaMP5G-T2A-mRuby3/UAS-Luc-RNAi
			Lpp-Gal4, UAS-GCaMP5G-T2A-mRuby3/UAS-Inx2-RNAi
	Figure 4	Fig. 4(C)	Lpp-Gal4, UAS-GCaMP5G-T2A-mRuby3
		Fig. 4(H-G)	Akh::GCaMP7S-T2A-mRuby3
		Fig. 4(I-L)	Lpp-Gal4, UAS-GCaMP5G-T2A-mRuby3
			UAS-Akh; Lpp-Gal4, UAS-GCaMP5G-T2A-mRuby3
	Figure 4	Fig. 5(B)	Lpp-Gal4, UAS-GCaMP5G-T2A-mRuby3/UAS-Luc-RNAi
			Lpp-Gal4, UAS-GCaMP5G-T2A-mRuby3/UAS-Inx2-RNAi
		Fig. 5(B)	Lpp-Gal4, UAS-GCaMP5G-T2A-mRuby3/UAS-Luc-RNAi
			Lpp-Gal4, UAS-GCaMP5G-T2A-mRuby3/UAS-Inx2-RNAi
	Figure 6	Fig. 6(B-C)	Lpp-Gal4, UAS-GCaMP5G-T2A-mRuby3
		Fig. 6(D-E)	Lpp-Gal4, UAS-GCaMP5G-T2A-mRuby3/UAS-AkhR-RNAi
			AkhRnull; Lpp-Gal4, UAS-GCaMP5G-T2A-mRuby3
	Figure 7	Fig. 7(A-G)	Akh-Gal4; UAS-GCaMP5G-T2A-mRuby3
	Figure 8	Fig. 8(A-C)	Lpp-Gal4, UAS-GCaMP5G-T2A-mRuby3
		Fig. 8(D-G)	Akh-Gal4; UAS-GCaMP5G-T2A-mRuby3
		Fig. 8(K)	w1118
			AkhRnull
	Supplementary Figure 1	SupFig. 1(A-C)	Lpp-Gal4, UAS-GCaMP5G-T2A-mRuby3
	Supplementary Figure 2	SupFig. 2(B)	Lpp-Gal4, UAS-GCaMP5G-T2A-mRuby3
	Supplementary Figure 3	SupFig. 3(A-D)	Lpp-Gal4, UAS-GCaMP5G-T2A-mRuby3
		SupFig. 3(E-F)	Lpp-Gal4, UAS-GCaMP5G-T2A-mRuby3/UAS-Luc-RNAi
			Lpp-Gal4, UAS-GCaMP5G-T2A-mRuby3/UAS-AkhR-RNAi
	Supplementary Figure 4	SupFig. 3(A-D)	tub-Gal80ts; Lpp-Gal4, UAS-GCaMP5G-T2A-mRuby3
			tub-Gal80ts; Lpp-Gal4, UAS-GCaMP5G-T2A-mRuby3/UAS-Gaq
			tub-Gal80ts; Lpp-Gal4, UAS-GCaMP5G-T2A-mRuby3/UAS-SERCA-RNAi
	Supplementary Figure 5	SupFig. 5(A-B)	Lpp-Gal4, UAS-GCaMP5G-T2A-mRuby3
	Supplementary Figure 6	SupFig. 6	Lpp-Gal4, UAS-GCaMP5G-T2A-mRuby3/UAS-Luc-RNAi
			Lpp-Gal4, UAS-GCaMP5G-T2A-mRuby3/UAS-Orge-RNAi
			Lpp-Gal4, UAS-GCaMP5G-T2A-mRuby3/UAS-Inx2-RNAi
			Lpp-Gal4, UAS-GCaMP5G-T2A-mRuby3/UAS-Inx3-RNAi
			Lpp-Gal4, UAS-GCaMP5G-T2A-mRuby3/UAS-Zpg-RNAi
			Lpp-Gal4, UAS-GCaMP5G-T2A-mRuby3/UAS-inx5-RNAi
			Lpp-Gal4, UAS-GCaMP5G-T2A-mRuby3/UAS-inx6-RNAi
			Lpp-Gal4, UAS-GCaMP5G-T2A-mRuby3/UAS-inx7-RNAi
			Lpp-Gal4, UAS-GCaMP5G-T2A-mRuby3/UAS-inx8-RNAi
	Supplementary Figure 7	SupFig. 7(A-D)	Lpp-Gal4, UAS-GCaMP5G-T2A-mRuby3/UAS-Luc-RNAi
			Lpp-Gal4, UAS-GCaMP5G-T2A-mRuby3/UAS-Inx2-RNAi
		SupFig. 7(E-G)	Lpp-Gal4, UAS-GCaMP5G-T2A-mRuby3
	Supplementary Figure 9	SupFig. 9(A-C)	Elav-Gal4; UAS-mRuby3; UAS-GCaMP7S
	Supplementary Figure 10	SupFig. 10(B)	Ilp2-Gal4; UAS-mRuby3; UAS-GCaMP7S, Akh::GCaMP7S-T2A-mRuby3
		SupFig. 10(E-G)	Ilp2-Gal4; UAS-mRuby3; UAS-GCaMP7S, Akh::GCaMP7S-T2A-mRuby3
	Supplementary Video 1		Fb-Gal4, UAS-GCaMP5G
	Supplementary Video 2		Fb-Gal4, UAS-GCaMP5G
	Supplementary Video 3		Lpp-Gal4, UAS-GCaMP5G-T2A-mRuby3/UAS-Luc-RNAi
			AkhRnull; Lpp-Gal4, UAS-GCaMP5G-T2A-mRuby3
			Lpp-Gal4, UAS-GCaMP5G-T2A-mRuby3/UAS-Gaq-RNAi
	Supplementary Video 4		Lpp-Gal4, UAS-GCaMP5G-T2A-mRuby3
			AkhRnull; Lpp-Gal4, UAS-GCaMP5G-T2A-mRuby3
	Supplementary Video 5		Lpp-Gal4, UAS-GCaMP5G-T2A-mRuby3/UAS-Luc-RNAi
			Lpp-Gal4, UAS-GCaMP5G-T2A-mRuby3/UAS-Inx2-RNAi
	Supplementary Video 6		Lpp-Gal4, UAS-GCaMP5G-T2A-mRuby3/UAS-Luc-RNAi
			Lpp-Gal4, UAS-GCaMP5G-T2A-mRuby3/UAS-Inx2-RNAi
			AkhRnull; Lpp-Gal4, UAS-GCaMP5G-T2A-mRuby3
			UAS-Akh; Lpp-Gal4, UAS-GCaMP5G-T2A-mRuby3
	Supplementary Video 6		Lpp-Gal4, UAS-GCaMP5G-T2A-mRuby3/UAS-Luc-RNAi
			Lpp-Gal4, UAS-GCaMP5G-T2A-mRuby3/UAS-Inx2-RNAi
	Supplementary Video 7		Lpp-Gal4, UAS-GCaMP5G-T2A-mRuby3/UAS-Luc-RNAi
			Lpp-Gal4, UAS-GCaMP5G-T2A-mRuby3/UAS-Inx2-RNAi
			AkhRnull; Lpp-Gal4, UAS-GCaMP5G-T2A-mRuby3
	Supplementary Video 10		Lpp-Gal4, UAS-GCaMP5G-T2A-mRuby3
	Supplementary Video 13		Lpp-Gal4, UAS-GCaMP5G-T2A-mRuby3
	Supplementary Video 14		Akh-Gal4; UAS-GCaMP5G-T2A-mRuby3
	Supplementary Video 15		Lpp-Gal4, UAS-GCaMP5G-T2A-mRuby3
